# Supplementary material
Source: Elsevier journal article supplement (https://www.sciencedirect.com/science/article/pii/S021391111630005X)
Supplement: mmc1 [file S021391111630005X:mmc1.docx]

**Anexo 1.** Clasificación Estadística Internacional de Mortalidad por Causas Externas según la CIE-10

| **Causas Externas de Mortalidad** | **Códigos**  **CIE-10 (V01 - Y89)** |
| --- | --- |
| Accidentes de transporte terrestre | V01 - V89, Y85.0 |
| Otros accidentes de transporte | V90 - V99, Y85.9 |
| Caídas | W00 - W19 |
| Accidentes causados por máquinas | W24 - W31 |
| Accidentes causados por disparo de armas de fuego | W32 - W34 |
| Ahogamiento y sumersión accidentales | W65 - W74 |
| Exposición al humo, fuego y llamas | X00 - X09 |
| Envenenamiento accidental por exposición a sustancias nocivas | X40 - X49 |
| Complicaciones de la atención médica y quirúrgica | Y40 - Y84, Y88 |
| Otros accidentes | W20 - W23, W35 - W64, W75 - W99, X10 - X39, X50 - X59, Y86, Y89.9 |
| Lesiones auto infligidas intencionalmente (suicidios) | X60 - X84, Y87.0 |
| Agresiones (homicidios) | X85 - Y09, Y87.1 |
| Intervención legal y operaciones de guerra | Y35 - Y36, Y89.0 - Y89.1 |
| Eventos de intención no determinada | Y10 - Y34, Y87.2 |
